# Supplementary material for: Salivary Proteome, Inflammatory, and NETosis Biomarkers in Older Adult Practitioners and Nonpractitioners of Physical Exercise
Source: Hindawi journal article supplement (doi:10.1155/2022/3725056), 2022-01-01
Supplement: f1 [file 3725056.f1.zip]

Table S1. Salivary proteins identified in the subjects.

| Proteins present exclusively in practitioners of physical activity | Accession number | Protein name                                                                                                |
|--------------------------------------------------------------------|------------------|-------------------------------------------------------------------------------------------------------------|
|                                                                    | A0A024R9T1       | HCG1745306, isoform CRA_a                                                                                   |
|                                                                    | A0A087WUZ2       | IgGfC-binding protein                                                                                       |
|                                                                    | A0A087WWU8       | Tropomyosin alpha-3 chain                                                                                   |
|                                                                    | A0A0F7SZ86       | IGHV2-70 protein (Fragment)                                                                                 |
|                                                                    | A0A0I9QQP6       | G protein-coupled receptor 154                                                                              |
|                                                                    | A0A0J9YY17       | Dynein heavy chain 10, axonemal (Fragment)                                                                  |
|                                                                    | A0A0S2Z4I7       | Vasodilator-stimulated phosphoprotein isoform 4 (Fragment)                                                  |
|                                                                    | A0A1S5UZ39       | Hemoglobin subunit alpha                                                                                    |
|                                                                    | A0A1W6IYJ1       | N90-VRC38.09 heavy chain variable region (Fragment)                                                         |
|                                                                    | A0A286YF91       | IgGfC-binding protein (Fragment)                                                                            |
|                                                                    | A0A2P9AHG4       | Metallophosphoesterase                                                                                      |
|                                                                    | A6XMH5           | Beta-2-microglobulin                                                                                        |
|                                                                    | A7E2D6           | NAV2 protein]                                                                                               |
|                                                                    | A8K0T9           | cDNA FLJ75422, highly similar to Homo sapiens capping protein (actin filament) muscle Z-line, alpha 1, mRNA |
|                                                                    | A8K739           | cDNA FLJ77339                                                                                               |
|                                                                    | A8MX94           | Glutathione S-transferase P                                                                                 |
|                                                                    | B0YJC5           | Vimentin OS=Homo sapiens OX=9606 GN=VIM PE=1 SV=1 - [B0YJC5_HUMAN]                                          |
|                                                                    | B2R4F3           | cDNA, FLJ92068, highly similar to Homo sapiens Rho GDP dissociation inhibitor (GDI) beta (ARHGDIB),mRNA     |
|                                                                    | B3KTM1           | Malate dehydrogenase                                                                                        |
|                                                                    | B4DHB3           | Phosphoglycerate kinase                                                                                     |
|                                                                    | B4DI38           | Adenylyl cyclase-associated protein                                                                         |
|                                                                    | B4DI57           | cDNA FLJ54111, highly similar to Sero transferrin                                                           |
|                                                                    | B4DM82           | Peptidyl-prolyl cis-trans isomerase                                                                         |
|                                                                    | B4DQ53           | cDNA FLJ51275                                                                                               |
|                                                                    | B4DU36           | cDNA FLJ57168, moderately similar to Transcription factor HES-1                                             |
|                                                                    | B4DWQ3           | Phosphoglycerate kinase                                                                                     |
|                                                                    | B4E1B2           | cDNA FLJ53691, highly similar to Sero transferrin                                                           |
|                                                                    | B4E1B3           | cDNA FLJ53950, highly similar to Angiotensinogen                                                            |
|                                                                    | B4E1T6           | cDNA FLJ54342, highly similar to Heat shock 70 kDa protein 1                                                |
|                                                                    | B4E397           | cDNA FLJ55140, highly similar to SPARC-like protein 1                                                       |
|                                                                    | B7Z747           | cDNA FLJ51120, highly similar to Matrix metalloproteinase-9 (EC 3.4.24.35)                                  |
|                                                                    | B8ZZ51           | Malate dehydrogenase, cytoplasmic                                                                           |
|                                                                    | C6GLU9           | Uncharacterized protein                                                                                     |

|        |                                                   |
|--------|---------------------------------------------------|
| C9J1G2 | DnaJ homolog subfamily B member 2 (Fragment)      |
| D6RFL4 | Monocyte differentiation antigen CD14 (Fragment)  |
| D6RHX1 | Mucin-7 (Fragment)                                |
| E5RFX6 | Serine protease inhibitor Kazal-type 7            |
| E5RJF6 | Carbonic anhydrase 1 (Fragment)                   |
| E7ESK7 | 14-3-3 protein zeta/delta (Fragment)              |
| E9PN95 | Uteroglobin                                       |
| F6KPG5 | Albumin (Fragment)                                |
| F8VV32 | Lysozyme                                          |
| F8WE70 | Serpin B13                                        |
| G3V1R1 | Basic salivary proline-rich protein 1             |
| G3V361 | Calmodulin-1 (Fragment)                           |
| G8I0M6 | Alkaline phosphatase liver/bone/kidney (Fragment) |
| H3BQN4 | Fructose-bisphosphate aldolase                    |
| H3BRL0 | Bardet-Biedl syndrome 2 protein homolog           |
| H3BU78 | Fructose-bisphosphate aldolase (Fragment)         |
| H7C0X8 | Macrophage-capping protein (Fragment)             |
| H7C234 | Dual-specificity phosphatase 28 (Fragment)        |
| H7C3U4 | E3 ubiquitin-protein ligase MYCBP2 (Fragment)     |
| H7C5U6 | Ribonuclease 3 (Fragment)                         |
| I3L1H9 | Zymogen granule protein 16 homolog B (Fragment)   |
| I3L312 | Protein disulfide-isomerase (Fragment)            |
| I3L3P5 | Protein disulfide-isomerase (Fragment)            |
| J3QKP1 | Cadherin-1 (Fragment)                             |
| J3QSF7 | Myeloperoxidase (Fragment)                        |
| K7EMV3 | Histone H3                                        |
| P00338 | L-lactate dehydrogenase A chain                   |
| P00491 | Purine nucleoside phosphorylase                   |
| P01857 | Immunoglobulin heavy constant gamma 1             |
| P01859 | Immunoglobulin heavy constant gamma 2             |
| P04083 | Annexin A1                                        |
| P06899 | Histone H2B type 1-J                              |
| P0DOY2 | Immunoglobulin lambda constant 2                  |
| P14618 | Pyruvate kinase PKM                               |
| P31151 | Protein S100-A7                                   |
| P35908 | Keratin, type II cytoskeletal 2 epidermal         |
| P52209 | 6-phosphogluconate dehydrogenase, decarboxylating |
| Q13747 | Alpha-1 antitrypsin (Fragment)                    |
| Q14019 | Coactosin-like protein                            |
| Q16378 | Proline-rich protein 4                            |
| Q2EQ98 | Envelope glycoprotein gp160                       |

|        |                                                    |
|--------|----------------------------------------------------|
| Q2Q9B7 | Glucose-6-phosphate 1-dehydrogenase (Fragment)     |
| Q499Z3 | Schlafen-like protein 1                            |
| Q49AK0 | LTA4H protein                                      |
| Q5JPJ9 | Uncharacterized protein<br>DKFZp686D0114           |
| Q5SX91 | Rab GDP dissociation inhibitor (Fragment)          |
| Q658Z1 | Uncharacterized protein<br>DKFZp666B131 (Fragment) |
| Q6PEJ8 | HP protein                                         |
| Q8IUI4 | Putative protein SNX29P2                           |
| Q8IZK6 | Mucolipin-2                                        |
| Q8TCG4 | TPMsk1 (Fragment)                                  |
| Q8WUW7 | Pyruvate kinase (Fragment)                         |
| Q96BG6 | ACTN4 protein (Fragment)                           |
| Q9GZL9 | Beta-globin (Fragment)                             |
| Q9HCC1 | Single chain Fv (Fragment)                         |
| Q9NSB8 | Homer protein homolog 2                            |
| Q9UM85 | Beta-globin protein (Fragment)                     |
| V9HW35 | Epididymis secretory protein Li 55                 |
| W8QEY1 | Lactoferrin OS=Homo sapiens                        |

| Proteins present exclusively in nonpractitioners of physical activity | Accession number | Protein name                                                                                     |
|-----------------------------------------------------------------------|------------------|--------------------------------------------------------------------------------------------------|
|                                                                       | A0A024R755       | Calumenin, isoform CRA_a                                                                         |
|                                                                       | A0A068LKQ8       | Ig heavy chain variable region (Fragment) OS=Homo sapiens OX=9606 PE=2 SV=1 - [A0A068LKQ8_HUMAN] |
|                                                                       | A0A075B6R9       | Immunoglobulin kappa variable 2D-24 (non-functional) (Fragment)                                  |
|                                                                       | A0A087WTV4       | Cleavage and polyadenylation-specificity factor subunit 1 (Fragment)                             |
|                                                                       | A0A0A0MRZ8       | Immunoglobulin kappa variable 3D-11                                                              |
|                                                                       | A0A0A0MS15       | Immunoglobulin heavy variable 3-49                                                               |
|                                                                       | A0A0C4DGB6       | Serum albumin                                                                                    |
|                                                                       | A0A0G2JL54       | Complement C4-B                                                                                  |
|                                                                       | A0A0G2JRN3       | Alpha-1-antitrypsin                                                                              |
|                                                                       | A0A0U4DKQ8       | Haptoglobin (Fragment)                                                                           |
|                                                                       | A0A0X1KG69       | InaD-like protein                                                                                |
|                                                                       | A0A0X9V9B3       | MS-F1 light chain variable region (Fragment)                                                     |
|                                                                       | A0A125U0V1       | MS-F1 heavy chain variable region (Fragment)                                                     |
|                                                                       | A0A140T9Y7       | tRNA (cytosine(34)-C(5))-methyltransferase                                                       |
|                                                                       | A0A193CHR0       | 10E8 heavy chain variable region (Fragment)                                                      |
|                                                                       | A0A1W2PQK0       | Protein SCO2 homolog, mitochondrial (Fragment)                                                   |
|                                                                       | A0A2P9AHE7       | Copper-exporting P-type ATPase A                                                                 |
|                                                                       | A0A2P9AJL7       | Acetolactate synthase large subunit IlvX                                                         |

|            |                                                                                                                           |
|------------|---------------------------------------------------------------------------------------------------------------------------|
| A0A2P9ANQ8 | Putative protease, membrane anchored]                                                                                     |
| A0A2P9APB3 | Putative soluble lytic murein transglycosylase                                                                            |
| A0M8Q6     | Immunoglobulin lambda constant 7                                                                                          |
| A2J1N7     | Rheumatoid factor RF-ET10 (Fragment)                                                                                      |
| A2J1N9     | Rheumatoid factor RF-ET12 (Fragment)                                                                                      |
| A8K2U0     | Alpha-2-macroglobulin-like protein 1                                                                                      |
| A8KAK1     | cDNA FLJ77398, highly similar to Homo sapiens UDP-glucose ceramide glucosyltransferase-like 1, transcript variant 2, mRNA |
| A8MZG1     | Thrombospondin-1 (Fragment)                                                                                               |
| B0AZS6     | 14-3-3 protein zeta/delta                                                                                                 |
| B2D098     | Alpha-1 antitrypsin Valcamonica variant (Fragment)                                                                        |
| B2R6X5     | cDNA, FLJ93166, highly similar to Homo sapiens heat shock 70kDa protein 6 (HSP70B') (HSPA6), mRNA                         |
| B2R8I2     | cDNA, FLJ93914, highly similar to Homo sapiens histidine-rich glycoprotein (HRG), mRNA                                    |
| B3KTT7     | Pannexin                                                                                                                  |
| B3KUV6     | cDNA FLJ40727 fis, clone TKIDN2000127, highly similar to Glycogenin-2 (EC 2.4.1.186)                                      |
| B4DEF7     | cDNA FLJ60062, highly similar to 78 kDa glucose-regulated protein                                                         |
| B4DI39     | cDNA FLJ54328, highly similar to Heat shock 70 kDa protein 1                                                              |
| B4DI70     | cDNA FLJ53509, highly similar to Galectin-3-binding protein                                                               |
| B4DL17     | cDNA FLJ52558, highly similar to Keratin, type I cytoskeletal 13                                                          |
| B4DNK4     | Pyruvate kinase                                                                                                           |
| B4DRR7     | cDNA FLJ59399, highly similar to Keratin, type II cytoskeletal 4                                                          |
| B4DRY0     | cDNA FLJ54379, highly similar to Keratin, type II cytoskeletal 6E                                                         |
| B4DWU6     | cDNA FLJ51361, highly similar to Keratin, type II cytoskeletal 6A                                                         |
| B4E022     | cDNA FLJ56274, highly similar to Transketolase (EC 2.2.1.1)                                                               |
| B4E1S8     | cDNA FLJ59147, highly similar to Cysteine-rich secretory protein 3                                                        |
| B4E1V0     | cDNA FLJ54839, highly similar to Lactotransferrin (EC 3.4.21.-)                                                           |
| B5BUM9     | Kallikrein 13 (Fragment)                                                                                                  |
| B7Z1L2     | cDNA FLJ59586, highly similar to Diacylglycerol kinase zeta (EC 2.7.1.107)                                                |
| B7ZAS5     | cDNA, FLJ79289, highly similar to Extracellular matrix protein 1                                                          |
| B8ZWD8     | Diazepam binding inhibitor, splice form 1D(1)                                                                             |
| B8ZZL6     | Macrophage-capping protein (Fragment)                                                                                     |
| C8CHS3     | Truncated extracellular matrix protein 1                                                                                  |
| C9J386     | Histone H2A                                                                                                               |

|         |                                                               |
|---------|---------------------------------------------------------------|
| D3DP13  | Fibrinogen beta chain, isoform CRA_e                          |
| D3DQX7  | Serum amyloid A protein                                       |
| E1B2D1  | Hemoglobin alpha-1 globin chain variant (Fragment)            |
| E5RFU9  | Serine protease inhibitor Kazal-type 5                        |
| E7EQB2  | Lactotransferrin (Fragment)                                   |
| E9M4D4  | Hemoglobin alpha-1 globin chain (Fragment)                    |
| E9PNW4  | CD59 glycoprotein                                             |
| F8VQNQ3 | Teneurin-2                                                    |
| F8W696  | Apolipoprotein A-I                                            |
| G3GAU4  | Anti-H1N1 influenza HA kappa chain variable region (Fragment) |
| G3V3E6  | ERO1-like protein alpha                                       |
| G5D862  | Cytochrome c oxidase subunit 1                                |
| H0YAL1  | Centrosomal protein of 63 kDa (Fragment)                      |
| H0YEG8  | Nucleobindin-2 (Fragment)                                     |
| H0YLF3  | Beta-2-microglobulin (Fragment)                               |
| H3BMQ8  | Fructose-bisphosphate aldolase A (Fragment)                   |
| H3BRB8  | Protein SOGA3 (Fragment)                                      |
| H3BVC8  | Prostasin (Fragment)                                          |
| H7C5H1  | Complement factor B (Fragment)                                |
| I3L223  | Leucine-rich repeat-containing protein 59                     |
| I3L4E5  | Aldehyde dehydrogenase, dimeric NADP-preferring (Fragment)    |
| I3NI44  | TOM1-like protein 1                                           |
| J3KRE2  | Rho GDP-dissociation inhibitor 1                              |
| J3KTJ1  | Myosin regulatory light chain 12A (Fragment)                  |
| J3QR68  | Haptoglobin (Fragment)                                        |
| K7EJB9  | Calreticulin (Fragment)                                       |
| K7EJY8  | Galectin-3-binding protein (Fragment)                         |
| K7EN27  | Protein/nucleic acid deglycase DJ-1 (Fragment)                |
| K7ESM3  | Galectin-3-binding protein (Fragment)                         |
| L8E7V1  | Alternative protein SPTLC1                                    |
| O14597  | Folate binding protein (Fragment)                             |
| O14942  | Heat shock protein beta (Fragment)                            |
| O60218  | Aldo-keto reductase family 1 member B10                       |
| P03973  | Antileukoproteinase                                           |
| P04259  | Keratin, type II cytoskeletal 6B                              |
| P04792  | Heat shock protein beta-1                                     |
| P07237  | Protein disulfide-isomerase                                   |
| P08670  | Vimentin                                                      |
| P0DOX6  | Immunoglobulin mu heavy chain                                 |
| P14550  | Alcohol dehydrogenase [NADP(+)]                               |

|        |                                                                                                  |
|--------|--------------------------------------------------------------------------------------------------|
| P14780 | Matrix metalloproteinase-9                                                                       |
| P29762 | Cellular retinoic acid-binding protein 1                                                         |
| P36952 | Serpin B5                                                                                        |
| P50395 | Rab GDP dissociation inhibitor beta                                                              |
| P80188 | Neutrophil gelatinase-associated lipocalin                                                       |
| P80723 | Brain acid soluble protein 1                                                                     |
| Q0QET7 | Glyceraldehyde-3-phosphate dehydrogenase (Fragment)                                              |
| Q13727 | AHNAK-related protein (Fragment)                                                                 |
| Q14CN2 | Calcium-activated chloride channel regulator 4                                                   |
| Q2TUW9 | Lactoferrin                                                                                      |
| Q4QQH3 | SLC8A1 protein (Fragment)                                                                        |
| Q53HF2 | Heat shock 70kDa protein 8 isoform 2 variant (Fragment)                                          |
| Q59FC2 | Acyl-Coenzyme A dehydrogenase family, member 8 variant (Fragment)                                |
| Q5T123 | SH3 domain-binding glutamic acid-rich-like protein 3                                             |
| Q5ZEZ4 | Alpha-actinin 1 (Fragment)                                                                       |
| Q68CZ6 | HAUS augmin-like complex subunit 3                                                               |
| Q68D45 | Uncharacterized protein DKFZp686C09257                                                           |
| Q6MZV6 | Uncharacterized protein DKFZp686L19235                                                           |
| Q6N041 | Uncharacterized protein DKFZp686O16217 (Fragment)                                                |
| Q6NS95 | IGL@ protein                                                                                     |
| Q6UWP8 | Suprabasin                                                                                       |
| Q6ZVX7 | F-box only protein 50                                                                            |
| Q7Z3Z0 | Keratin, type I cytoskeletal 25                                                                  |
| Q86TT1 | Full-length cDNA clone CS0DD006YL02 of Neuroblastoma of                                          |
| Q86TY5 | Galectin                                                                                         |
| Q8IZU1 | Protein FAM9A                                                                                    |
| Q8WYJ6 | Septin-1                                                                                         |
| Q96BQ1 | Protein FAM3D                                                                                    |
| Q96K68 | cDNA FLJ14473 fis, clone MAMMA1001080, highly similar to Homo sapiens SNC73 protein (SNC73) mRNA |
| Q9NP55 | BPI fold-containing family A member 1                                                            |
| Q9NPP6 | Immunoglobulin heavy chain variant (Fragment)                                                    |
| Q9UI81 | PRO0159                                                                                          |
| Q9UIV8 | Serpin B13                                                                                       |
| Q9UK54 | Hemoglobin beta subunit variant (Fragment)                                                       |
| Q9UL71 | Myosin-reactive immunoglobulin heavy chain variable region (Fragment)                            |
| Q9UL72 | Myosin-reactive immunoglobulin heavy chain variable region (Fragment)                            |
| Q9Y6R7 | IgGfC-binding protein                                                                            |

|                                        |                         |                                                                                    |
|----------------------------------------|-------------------------|------------------------------------------------------------------------------------|
|                                        | R4GMQ5                  | Cathepsin B (Fragment)                                                             |
|                                        | S6B291                  | IgG H chain                                                                        |
|                                        | V9HW05                  | Epididymis luminal protein 210                                                     |
|                                        | V9HW34                  | Epididymis luminal protein 213                                                     |
|                                        | V9HW68                  | Epididymis luminal protein 214                                                     |
|                                        | X6R3S7                  | Trefoil factor 3                                                                   |
|                                        |                         |                                                                                    |
| <b>Proteins present in both groups</b> | <b>Accession number</b> | <b>Protein name</b>                                                                |
|                                        | A0A024R528              | Interleukin-1                                                                      |
|                                        | A0A024R609              | Pyruvate kinase                                                                    |
|                                        | A0A024RC30              | Desmoglein 3 (Pemphigus vulgaris antigen), isoform CRA_a                           |
|                                        | A0A075B6H7              | Immunoglobulin kappa variable 3-7 (non-functional) (Fragment)                      |
|                                        | A0A087WWF8              | Mucin-like protein 1                                                               |
|                                        | A0A087WYF5              | Salivary acidic proline-rich phosphoprotein 1/2 (Fragment)                         |
|                                        | A0A0A0MRQ5              | Peroxisedoxin-1                                                                    |
|                                        | A0A0B4J1R6              | Transketolase                                                                      |
|                                        | A0A0C4DGM6              | Mucin-21                                                                           |
|                                        | A0A0C4DGN4              | Zymogen granule protein 16 homolog B                                               |
|                                        | A0A0G2JMB2              | Immunoglobulin heavy constant alpha 2 (Fragment)                                   |
|                                        | A0A0J9YXP8              | Glucose-6-phosphate isomerase (Fragment)                                           |
|                                        | A0A0K0K1H8              | Epididymis secretory sperm binding protein Li 71p                                  |
|                                        | A0A0U1RR93              | SH3 and multiple ankyrin repeat domains protein 3                                  |
|                                        | A0A0X9T0H6              | GCT-A5 heavy chain variable region (Fragment)                                      |
|                                        | A0A0X9T7V9              | GCT-A4 light chain variable region (Fragment)                                      |
|                                        | A0A0X9TD47              | MS-D1 light chain variable region (Fragment)                                       |
|                                        | A0A0X9UWL5              | GCT-A5 light chain variable region (Fragment)                                      |
|                                        | A0A125U0U7              | MS-C1 heavy chain variable region (Fragment)                                       |
|                                        | A0A193CHQ9              | 10E8 heavy chain variable region (Fragment)                                        |
|                                        | A0A1L2BPJ2              | Kallikrein-1 isoform 4                                                             |
|                                        | A0A1U9X7W4              | HSPA1A                                                                             |
|                                        | A0A1W6IYI5              | N90-VRC38.08 heavy chain variable region (Fragment)                                |
|                                        | A0A1W6IYJ0              | N90-VRC38.03 heavy chain variable region (Fragment)                                |
|                                        | A0A2P9AST2              | Uncharacterized protein                                                            |
|                                        | A0M8Q9                  | C1 segment protein (Fragment)                                                      |
|                                        | A0NA61                  | Codes for truncated alpha mRNA of alpha heavy chain disease patient LTE (Fragment) |
|                                        | A2J1N0                  | Rheumatoid factor RF-IP14 (Fragment)                                               |
|                                        | A2KBB9                  | Anti-(ED-B) scFV (Fragment)                                                        |
|                                        | A2MYD4                  | V2-7 protein (Fragment)                                                            |

|        |                                                                                                                  |
|--------|------------------------------------------------------------------------------------------------------------------|
| A2MYE1 | A30 (Fragment)                                                                                                   |
| A8K008 | Uncharacterized protein                                                                                          |
| A8K486 | Peptidyl-prolyl cis-trans isomerase                                                                              |
| A8K4L6 | Vang-like protein                                                                                                |
| A8K5I6 | cDNA FLJ78643, highly similar to Homo sapiens cornulin (CRNN), mRNA                                              |
| B1AN48 | Small proline-rich protein 3 (Fragment)                                                                          |
| B2R4M6 | Protein S100                                                                                                     |
| B2R7Z6 | cDNA, FLJ93674                                                                                                   |
| B3EWG6 | Protein FAM25G                                                                                                   |
| B3KPZ8 | cDNA FLJ32530 fis, clone SMINT2000185, highly similar to TRANSKETOLASE (EC 2.2.1.1)                              |
| C9JEV0 | Zinc-alpha-2-glycoprotein                                                                                        |
| C9JKF7 | Lymphocyte-specific protein 1 (Fragment)                                                                         |
| C9JL93 | Serpin B13 (Fragment)                                                                                            |
| D3DP16 | Fibrinogen gamma chain, isoform CRA_a                                                                            |
| D6CHE9 | Proteinase 3                                                                                                     |
| D6RD17 | Immunoglobulin J chain (Fragment)                                                                                |
| D6RE86 | Ceruloplasmin (Fragment)                                                                                         |
| D6REL8 | Fibrinogen beta chain                                                                                            |
| E7ER44 | Lactotransferrin                                                                                                 |
| E9PK47 | Alpha-1,4 glucan phosphorylase                                                                                   |
| E9PKG6 | Nucleobindin-2                                                                                                   |
| E9PLJ3 | Cofilin-1 (Fragment)                                                                                             |
| F2Z393 | Transaldolase                                                                                                    |
| F5H386 | Lactoperoxidase                                                                                                  |
| F5H6Q0 | Rho GDP-dissociation inhibitor 2 (Fragment)                                                                      |
| F8WBR5 | Calmodulin-2                                                                                                     |
| F8WE65 | Peptidyl-prolyl cis-trans isomerase                                                                              |
| G3V1A4 | Cofilin 1 (Non-muscle), isoform CRA_a                                                                            |
| B3KS49 | cDNA FLJ35478 fis, clone SMINT2007796, highly similar to Gelsolin                                                |
| B3KVV6 | cDNA FLJ41607 fis, clone CTONG3001370, highly similar to Homo sapiens alpha-2-macroglobulin-like 1 (A2ML1), mRNA |
| B4DE36 | Glucose-6-phosphate isomerase                                                                                    |
| B4DEK5 | cDNA FLJ54596, highly similar to Proactivator polypeptide                                                        |
| B4DFN9 | cDNA FLJ54303, highly similar to Heat shock 70 kDa protein 1                                                     |
| B4DJ11 | cDNA FLJ52549, highly similar to L-lactate dehydrogenase A chain (EC 1.1.1.27)                                   |
| B4DMB4 | Synaptobrevin-like 1, isoform CRA_a                                                                              |
| B4DMJ7 | HCG2015269, isoform CRA_c                                                                                        |



|        |                                                                                              |
|--------|----------------------------------------------------------------------------------------------|
| B4DN40 | cDNA FLJ54368, highly similar to Phosphoglucomutase-2 (EC 5.4.2.2)                           |
| B4DNL5 | Protein disulfide-isomerase                                                                  |
| B4DNY3 | Adenylyl cyclase-associated protein                                                          |
| B4DQ50 | cDNA FLJ56823, highly similar to Protein-glutamine gamma-glutamyltransferase E (EC 2.3.2.13) |
| B4DRT4 | cDNA FLJ51535, highly similar to Phosphatidylethanolamine-binding protein 1                  |
| B4DS71 | cDNA FLJ57081, moderately similar to WD repeat protein 1                                     |
| B4DTI0 | cDNA FLJ52521, highly similar to Actin-like protein 3                                        |
| B4DVQ0 | cDNA FLJ58286, highly similar to Actin, cytoplasmic 2                                        |
| B4DVZ8 | Leukotriene A(4) hydrolase                                                                   |
| B4DW52 | cDNA FLJ55253, highly similar to Actin, cytoplasmic 1                                        |
| B4DWS9 | cDNA FLJ57640, highly similar to Serpin B5                                                   |
| B4DWU0 | cDNA FLJ56791, highly similar to Keratin, type I cytoskeletal 16                             |
| B4E1M1 | cDNA FLJ60391, highly similar to Lactoperoxidase (EC 1.11.1.7)                               |
| B4E216 | cDNA FLJ57339, highly similar to Complement C3                                               |
| B4E2U0 | 6-phosphogluconate dehydrogenase, decarboxylating                                            |
| B4E3A8 | cDNA FLJ53963, highly similar to Leukocyte elastase inhibitor                                |
| B7Z4U6 | cDNA FLJ55803, highly similar to Gelsolin                                                    |
| B7Z507 | cDNA FLJ51036, highly similar to Matrix metalloproteinase-9 (EC3.4.24.35)                    |
| B7Z553 | cDNA FLJ51266, highly similar to Vitronectin                                                 |
| B7Z565 | cDNA FLJ54739, highly similar to Alpha-actinin-1                                             |
| B7Z5V2 | cDNA FLJ54141, highly similar to Ezrin                                                       |
| B7Z6P1 | cDNA FLJ53662, highly similar to Actin, alpha skeletal muscle                                |
| B7ZAL5 | cDNA, FLJ79229, highly similar to Lactotransferrin (EC 3.4.21.-)                             |
| B7ZLF8 | Uncharacterized protein                                                                      |
| B7ZW15 | Uncharacterized protein                                                                      |
| C7DJS2 | Glutathione S-transferase pi (Fragment)                                                      |
| C8C504 | Beta-globin                                                                                  |
| G3V5B3 | ERO1-like protein alpha (Fragment)                                                           |
| H0YAS8 | Clusterin (Fragment)                                                                         |
| H0YFX9 | Histone H2A (Fragment)                                                                       |
| H0YGG5 | Alpha-2-macroglobulin-like protein 1 (Fragment)                                              |
| H0YJV2 | Serine palmitoyltransferase 2 (Fragment)                                                     |
| H3BPS8 | Fructose-bisphosphate aldolase A (Fragment)                                                  |

|        |                                                              |
|--------|--------------------------------------------------------------|
| H3BUH7 | Fructose-bisphosphate aldolase A (Fragment)                  |
| H6VRF8 | Keratin 1                                                    |
| H6VRG2 | Keratin 1                                                    |
| I3L3W9 | Aldehyde dehydrogenase, dimeric NADP-preferring (Fragment)   |
| I3NI03 | Protein disulfide-isomerase (Fragment)                       |
| J3QLC9 | Haptoglobin (Fragment)                                       |
| K7EM49 | 6-phosphogluconate dehydrogenase, decarboxylating (Fragment) |
| K7EQQ3 | Keratin, type I cytoskeletal 9                               |
| L0R4T3 | Histone H2B                                                  |
| O75594 | Peptidoglycan recognition protein 1                          |
| P00558 | Phosphoglycerate kinase 1                                    |
| P00738 | Haptoglobin                                                  |
| P01023 | Alpha-2-macroglobulin                                        |
| P01024 | Complement C3                                                |
| P01034 | Cystatin-C                                                   |
| P01036 | Cystatin-S                                                   |
| P01037 | Cystatin-SN                                                  |
| P01591 | Immunoglobulin J chain                                       |
| P01833 | Polymeric immunoglobulin receptor                            |
| P01860 | Immunoglobulin heavy constant gamma 3                        |
| P01861 | Immunoglobulin heavy constant gamma 4                        |
| P01871 | Immunoglobulin heavy constant mu                             |
| P01876 | Immunoglobulin heavy constant alpha 1                        |
| P02647 | Apolipoprotein A-I                                           |
| P02768 | Serum albumin                                                |
| P02787 | Serotransferrin                                              |
| P02790 | Hemopexin                                                    |
| P02808 | Statherin                                                    |
| P02812 | Basic salivary proline-rich protein 2                        |
| P02814 | Submaxillary gland androgen-regulated protein 3B             |
| P04040 | Catalase                                                     |
| P04080 | Cystatin-B                                                   |
| P04406 | Glyceraldehyde-3-phosphate dehydrogenase                     |
| P04745 | Alpha-amylase 1                                              |
| P05109 | Protein S100-A8                                              |
| P05164 | Myeloperoxidase                                              |
| P05204 | Non-histone chromosomal protein HMG-17                       |
| P06733 | Alpha-enolase                                                |
| P07476 | Involucrin                                                   |
| P07737 | Profilin-1                                                   |

|        |                                                       |
|--------|-------------------------------------------------------|
| P09211 | Glutathione S-transferase P                           |
| P09228 | Cystatin-SA                                           |
| P0DOX2 | Immunoglobulin alpha-2 heavy chain                    |
| P0DOX7 | Immunoglobulin kappa light chain                      |
| P10599 | Thioredoxin                                           |
| P10909 | Clusterin                                             |
| P12273 | Prolactin-inducible protein                           |
| P13645 | Keratin, type I cytoskeletal 10                       |
| P13796 | Plastin-2                                             |
| P14174 | Macrophage migration inhibitory factor                |
| P15515 | Histatin-1                                            |
| P18669 | Phosphoglycerate mutase 1                             |
| P20061 | Transcobalamin-1                                      |
| P22528 | Cornifin-B                                            |
| P22531 | Small proline-rich protein 2E                         |
| P22532 | Small proline-rich protein 2D                         |
| P23280 | Carbonic anhydrase 6                                  |
| P27482 | Calmodulin-like protein 3]                            |
| P28325 | Cystatin-D                                            |
| P29508 | Serpin B3                                             |
| P30086 | Phosphatidylethanolamine-binding protein 1            |
| P31025 | Lipocalin-1                                           |
| P31146 | Coronin-1A                                            |
| P31947 | 14-3-3 protein sigma                                  |
| P31949 | Protein S100-A11                                      |
| P35321 | Cornifin-A                                            |
| P35326 | Small proline-rich protein 2A                         |
| P35527 | Keratin, type I cytoskeletal 9                        |
| P40925 | Malate dehydrogenase, cytoplasmic                     |
| P55058 | Phospholipid transfer protein                         |
| P59665 | Neutrophil defensin 1                                 |
| P61626 | Lysozyme C                                            |
| P61769 | Beta-2-microglobulin                                  |
| P62328 | Thymosin beta-4                                       |
| P62805 | Histone H4                                            |
| P63104 | 14-3-3 protein zeta/delta                             |
| P68871 | Hemoglobin subunit beta                               |
| Q01469 | Fatty acid-binding protein, epidermal                 |
| Q02413 | Desmoglein-1                                          |
| Q07654 | Trefoil factor 3                                      |
| Q0KKI6 | Immunoglobulin light chain (Fragment)                 |
| Q0ZCH9 | Immunoglobulin heavy chain variable region (Fragment) |

|        |                                                                                       |
|--------|---------------------------------------------------------------------------------------|
| Q14508 | WAP four-disulfide core domain protein 2                                              |
| Q15847 | Adipogenesis regulatory factor                                                        |
| Q2I377 | Small proline rich protein                                                            |
| Q4VAY2 | PRB3 protein                                                                          |
| Q53H26 | Transferrin variant (Fragment)                                                        |
| Q53H37 | Calmodulin-like skin protein variant (Fragment)                                       |
| Q53HE2 | Triosephosphate isomerase (Fragment)                                                  |
| Q562R1 | Beta-actin-like protein 2                                                             |
| Q5H9A7 | Metalloproteinase inhibitor 1                                                         |
| Q5T3N1 | Annexin (Fragment)                                                                    |
| Q63HM4 | Uncharacterized protein DKFZp686P18250                                                |
| Q68DY8 | Uncharacterized protein DKFZp686I11137                                                |
| Q6B823 | Histone H4 (Fragment)                                                                 |
| Q6GMX6 | IGH@ protein                                                                          |
| Q6MZM9 | Proline-rich protein 27                                                               |
| Q6N093 | Uncharacterized protein DKFZp686I04196 (Fragment)                                     |
| Q6P1N4 | IQGAP1 protein (Fragment)                                                             |
| Q6P5S2 | Protein LEG1 homolog                                                                  |
| Q6PJT4 | MSN protein (Fragment)                                                                |
| Q6ZW64 | cDNA FLJ41552 fis, clone COLON2004478, highly similar to Protein Tro alpha1 H,myeloma |
| Q86WA0 | Hypoxia-inducible HIG-1 (Fragment)                                                    |
| Q8N4F0 | BPI fold-containing family B member 2                                                 |
| Q8TAX7 | Mucin-7                                                                               |
| Q8TDL5 | BPI fold-containing family B member 1                                                 |
| Q96DR5 | BPI fold-containing family A member 2                                                 |
| Q9GZZ8 | Extracellular glycoprotein lacritin                                                   |
| Q9HC84 | Mucin-5B                                                                              |
| Q9P173 | PRO2275                                                                               |
| Q9UBC9 | Small proline-rich protein 3                                                          |
| Q9UGM3 | Deleted in malignant brain tumors 1 protein                                           |
| Q9UJU1 | Cytovillin 2 (Fragment)                                                               |
| Q9UL78 | Myosin-reactive immunoglobulin light chain variable region (Fragment)                 |
| Q9UL90 | Myosin-reactive immunoglobulin heavy chain variable region (Fragment)                 |
| Q9UNU2 | Complement protein C4B frameshift mutant (Fragment)                                   |
| R4GN49 | Protein S100-A2                                                                       |
| S4R460 | Immunoglobulin heavy variable 3/OR16-9 (non-functional)                               |
| S6B2A1 | IgG L chain                                                                           |
| S6BAN6 | IgG L chain                                                                           |
| S6BGD6 | IgG L chain                                                                           |

|        |                                     |
|--------|-------------------------------------|
| U3PXP0 | Alpha globin chain (Fragment)       |
| V9HWC6 | Peptidyl-prolyl cis-trans isomerase |
| V9HWK1 | Triosephosphate isomerase           |
| X6RJP6 | Transgelin-2 (Fragment)             |

---
