# Supplementary material for: Salivary Proteome, Inflammatory, and NETosis Biomarkers in Older Adult Practitioners and Nonpractitioners of Physical Exercise
Source: Oxid Med Cell Longev. 2022 Apr 23;2022:3725056. doi: 10.1155/2022/3725056 (PMC9056209; doi:10.1155/2022/3725056)
Supplement: Supplementary Materials — Table S1: salivary proteins identified in the subjects. Figure S1: representative graph (heat map) of the 10 proteins differentially expressed (p < 0.05) between practitioners (PE) and nonpractitioners (NPE) of physical exercise groups. Note: all the evaluations were performed in duplicate and are indicated by the letters a and b for each sample. In addition, it was not possible to obtain data from one of the participants in the PE group, and also, we added one more participant in the NPE group. [file 3725056.f1.zip]

Archive with 2 entries (2 files):
- Supplemental_Figure_S1.psd
- 3725056.f1.pdf
